# Supplementary material for: HECTD3 mediates TRAF3 polyubiquitination and type I interferon induction during bacterial infection
Source: JCI journal article supplement (doi:10.1172/jci120406), 2018-06-19

## Supplementary Figures

**Supplemental Figure 1. Immune cell composition is not altered in the absence of HECTD3.** (A) Targeting strategy used to generate *Hectd3*<sup>-/-</sup> mice and primers used for genotyping. (B) Genotyping of offspring generated from breeding of *Hectd3* heterozygous mice. (C) Western blot analysis of HECTD3 in the liver, kidney, and brain of WT and *Hectd3*<sup>-/-</sup> mice. (D) Flow cytometry analysis of CD4<sup>+</sup> T cells, CD8<sup>+</sup> T cells, B cells, and neutrophils in the bone marrow (BM), spleen, and peripheral blood from WT and *Hectd3*<sup>-/-</sup> mice. (E) Flow cytometry analysis of dendritic cells in the spleen from WT and *Hectd3*<sup>-/-</sup> mice. (F) Flow cytometry analysis of macrophages in the spleen from WT and *Hectd3*<sup>-/-</sup> mice. (G) Flow cytometry analysis of basophils in BM from WT and *Hectd3*<sup>-/-</sup> mice. Data represent 3 independent experiments.

**Supplemental Figure 2. HECTD3 deficiency attenuates the susceptibility of mice to *F. novicida* infection.** (A) *Hectd3*<sup>-/-</sup> mice and littermate WT controls were infected subcutaneously with *F. novicida* ( $3.0 \times 10^5$  CFUs) for 2 days. WT mice exhibited ruffled fur and hunched back. (B) Production of TNF- $\alpha$ , IL-6, IL-1 $\beta$ , and IFN- $\beta$  in sera from WT and *Hectd3*<sup>-/-</sup> mice infected with *F. novicida* for 2 days. Data represent 3 independent experiments and are presented as mean $\pm$ SEM. \*,  $P < 0.05$ ; \*\*\*,  $P < 0.001$ ; ns, not significant.

**Supplemental Figure 3. Immune cell composition in lungs is comparable between WT and *Hectd3*<sup>-/-</sup> mice at 12 h after intranasal infection with *F.***

**novicida.** (A-C) *Hectd3*<sup>-/-</sup> mice and littermate WT controls were intranasally infected with *F. novicida* (800 CFUs per mouse) for 3 days, and bacterial burden was analyzed in the lungs (A), peripheral blood (B), and spleen (C). (D-G) *Hectd3*<sup>-/-</sup> mice and littermate WT controls were intranasally infected with GFP-expressing *F. novicida* (5,000 CFUs per mouse) for 12 h. (D) Bacterial burden was analyzed in lungs of WT and *Hectd3*<sup>-/-</sup> mice after *F. novicida* infection. (E) Flow cytometry analysis of total macrophages and GFP<sup>+</sup> macrophages in lungs of WT and *Hectd3*<sup>-/-</sup> mice after *F. novicida* infection. (F) Flow cytometry analysis of total neutrophils and GFP<sup>+</sup> neutrophils in lungs of WT and *Hectd3*<sup>-/-</sup> mice after *F. novicida* infection. (G) Flow cytometry analysis of total B cells and T cells in lungs of WT mice after *F. novicida* infection. Each symbol indicates an individual mouse. Data represent 2 independent experiments and are presented as mean±SEM. \*, *P*<0.05; \*\*, *P*<0.01; ns, not significant.

**Supplemental Figure 4. Differentially expressed genes in uninfected and *F. novicida*-infected WT and *Hectd3*<sup>-/-</sup> BMDMs.** (A) RNA sequencing analysis of gene expression in uninfected and *F. novicida*-infected WT and *Hectd3*<sup>-/-</sup> BMDMs for 8 (*F. n* 8 h) and 12 (*F. n* 12 h) h, respectively. Differentially expressed genes in WT and *Hectd3*<sup>-/-</sup> BMDMs are shown. (B) Differentially expressed genes in *F. novicida*-infected WT BMDMs for 8 h (WT\_8) versus uninfected WT BMDMs (WT\_0). (C) Differentially expressed genes in *F. novicida*-infected *Hectd3*<sup>-/-</sup> BMDMs for 8 h (KO\_8) versus uninfected *Hectd3*<sup>-/-</sup> BMDMs (KO\_0). (D) Differentially expressed genes in *F. novicida*-infected WT

BMDMs for 12 h (WT\_12) versus uninfected WT BMDMs (WT\_0). (E) Differentially expressed genes in *F. novicida*-infected *Hectd3*<sup>-/-</sup> BMDMs for 12 h (KO\_12) versus uninfected *Hectd3*<sup>-/-</sup> BMDMs (KO\_0). Red and green dots indicate upregulated and downregulated genes, respectively.

**Supplemental Figure 5. HECTD3 mediates type I IFN production in response to *F. novicida*, *Mycobacterium*, *Listeria*, and *E. coli* infection.** (A) BMDMs from WT and *Hectd3*<sup>-/-</sup> mice were infected with *F. novicida* (100 MOI) for indicated times, and expression of *Ifit*, *Irf1*, *Isg15*, *Il6*, *Il1a*, and *Hectd3* was analyzed by qRT-PCR. (B) BMDMs from WT and *Hectd3*<sup>-/-</sup> mice were infected with BCG-GFP (100 MOI) for indicated times, and expression of *Ifnb*, *Cxcl9*, *Irf1*, *Mx1*, *Ifnb*, *Il6*, *Tnfa*, and *Hectd3* was analyzed by qRT-PCR. (C) BMDMs from WT and *Hectd3*<sup>-/-</sup> mice were infected with *L. monocytogenes* (20 MOI) for indicated times, and gene expression of *Ifnb*, *Cxcl9*, *Irf1*, *Mx1*, *Il6*, and *Tnfa* was analyzed by qRT-PCR. (D) BMDMs from WT and *Hectd3*<sup>-/-</sup> mice were infected with *E. coli* (100 MOI) for indicated times, and expression of *Ifnb*, *Cxcl9*, *Irf1*, *Mx1*, *Il6*, and *Tnfa* was analyzed by qRT-PCR. Data represent 3 independent experiments and are presented as mean±SEM. \*, *P*<0.05; \*\*, *P*<0.01; \*\*\*, *P*<0.001; \*\*\*\*, *P*<0.0001; ns, not significant.

**Supplemental Figure 6. HECTD3 mediates type I IFN production in response to HSV infection.** (A) BMDMs from WT and *Hectd3*<sup>-/-</sup> mice were infected with HSV (3 MOI) for indicated times, and expression of *Ifnb*, *Cxcl9*, *Mx1*,

*Irf1*, *Tnf*, and *Hectd3* was analyzed by qRT-PCR. (B) Immunoblot analysis of phosphorylation of TBK1 and IRF3, and total TBK1 and IRF3 in uninfected and HSV-infected WT and *Hectd3*<sup>-/-</sup> BMDMs. Data represent 2 independent experiments and are presented as mean±SEM. \*, *P*<0.05; \*\*, *P*<0.01; \*\*\*, *P*<0.001; ns, not significant.

**Supplemental Figure 7. Cell death is reduced in *Hectd3*<sup>-/-</sup> BMDMs during *F. novicida* infection.** (A) Immunoblot analysis of caspases 1, 3, 8 and 11, ZBP1, and MLKL phosphorylation in uninfected and *F. novicida*-infected WT and *Hectd3*<sup>-/-</sup> BMDMs for 14 h. GAPDH was used as loading control. (B) LDH release in uninfected and *F. novicida*-infected WT and *Hectd3*<sup>-/-</sup> BMDMs for 14 h. (C) Microscopy analysis of uninfected and *F. novicida*-infected WT and *Hectd3*<sup>-/-</sup> BMDMs for 14 h. Data represent 3 independent experiments. Scale bars, 20 μm for (C).

**Supplemental Figure 8. HECTD3 is required for inflammasome activation during *Mycobacterium* and *Listeria* infection.** (A) WT and *Hectd3*<sup>-/-</sup> BMDMs were stimulated with lipopolysaccharide and ATP for NLRP3 inflammasome activation and infected with *Salmonella* for NLRC4 inflammasome activation. (B and C) WT and *Hectd3*<sup>-/-</sup> BMDMs were transfected with plasmid DNA (B) or poly(dA:dT) (C) for canonical AIM2 inflammasome activation. (D) Immunoblot analysis of LC3, TFEB, and HECTD3 in uninfected BMDMs and WT and *Hectd3*<sup>-/-</sup> BMDMs infected with *F. novicida* for indicated times. (E) Inflammasome

activation was detected in WT and *Hectd3*<sup>-/-</sup> BMDMs infected with BCG-GFP or *Listeria*. Supernatant (Sup) was used to detect cleaved caspase 1; cell lysate (Cell) was used for pre-caspase-1, HECTD3, and GAPDH blotting. GAPDH was used as loading control. Data represent 3 independent experiments.

**Supplemental Figure 9. HECTD3 is essential for TRIF- and STING-dependent type I IFN production.** (A) Gene expression analysis of WT and *Hectd3*<sup>-/-</sup> BMDMs in response to Pam3CSK4 stimulation for indicated times. (B) Gene expression analysis of WT and *Hectd3*<sup>-/-</sup> BMDMs in response to imiquimod or CpG ODN stimulation for indicated times. (C) Gene expression analysis of WT and *Hectd3*<sup>-/-</sup> BMDMs in response to poly(I:C) or dsRNA transfection treatment for indicated times. (D) Gene expression analysis of WT and *Hectd3*<sup>-/-</sup> MEFs in response to poly(I:C) or dsRNA transfection treatment for indicated times. Data represent 3 independent experiments and are presented as mean±SEM. \*,  $P<0.05$ ; ns, not significant.

**Supplemental Figure 10. HECTD3 interacts with TRIF, STING and TBK1.** Immunoblot analysis of HECTD3 that co-immunoprecipitated with FLAG-tagged TRIF, STING, and TBK1 from lysates of HEK293T cells transfected with plasmids as indicated. Data represent 3 independent experiments.

**Supplemental Figure 11. HECTD3-mediated TRAF3 polyubiquitination and TBK1 activation.** (A) Co-IP analysis of K6-, K11-, K27-, K29-, K33- or K0 (all

Lysine residues were mutated)-linked polyubiquitination of TRAF3 mediated by HECTD3 in HEK293T cells transfected with plasmids as indicated. K48+MG132 indicates detection of K48-linked polyubiquitination of TRAF3 in the presence of MG132 treatment. **(B)** Upon bacterial infection, TLR4, TLR3, and cGAS engagements recruit adaptor proteins TRIF and STING to activate TRAF3. In turn, HECTD3-mediated K63-linked polyubiquitination of TRAF3 facilitates the activation of TBK1 by TRAF3-associated complexes and type I IFN induction. Data represent 2 independent experiments for **(A)**.

### **Supplementary Tables**

**Supplemental Table 1. Upregulated genes.** Comparison of genes upregulated in uninfected WT BMDMs versus uninfected *Hectd3*<sup>-/-</sup> BMDMs; WT BMDMs infected with *F. novicida* for 8 h versus *Hectd3*<sup>-/-</sup> BMDMs infected with *F. novicida* for 8 h; WT BMDMs infected with *F. novicida* for 12 h versus *Hectd3*<sup>-/-</sup> BMDMs infected with *F. novicida* for 12 h; WT BMDMs infected with *F. novicida* for 8 h versus uninfected WT BMDMs; *Hectd3*<sup>-/-</sup> BMDMs infected with *F. novicida* for 8 h versus uninfected *Hectd3*<sup>-/-</sup> BMDMs; WT BMDMs infected with *F. novicida* for 12 h versus uninfected WT BMDMs; and *Hectd3*<sup>-/-</sup> BMDMs infected with *F. novicida* for 12 h versus uninfected *Hectd3*<sup>-/-</sup> BMDMs.

**Supplemental Table 2. Primer sequences for real-time qPCR.**

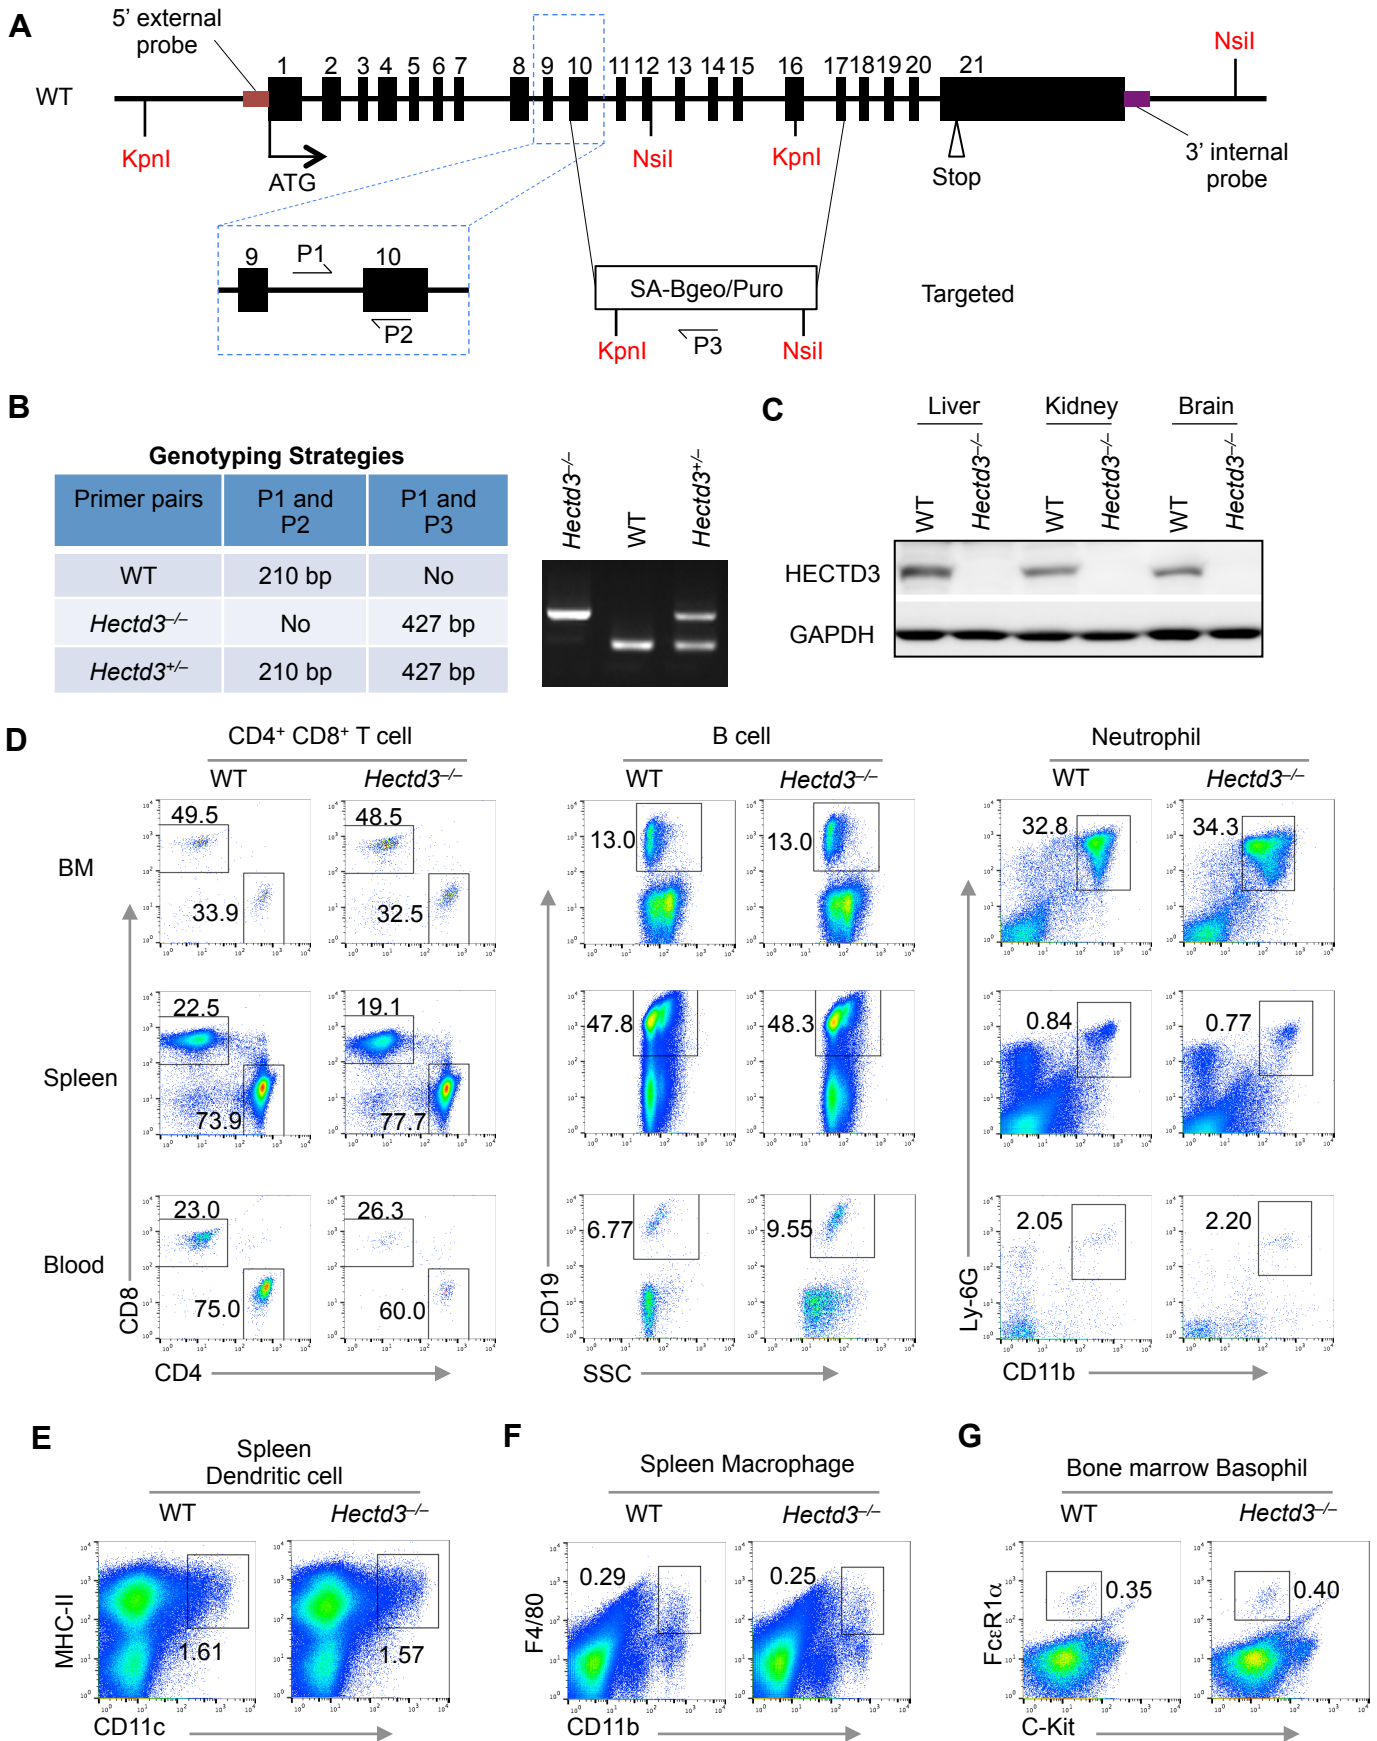

**A**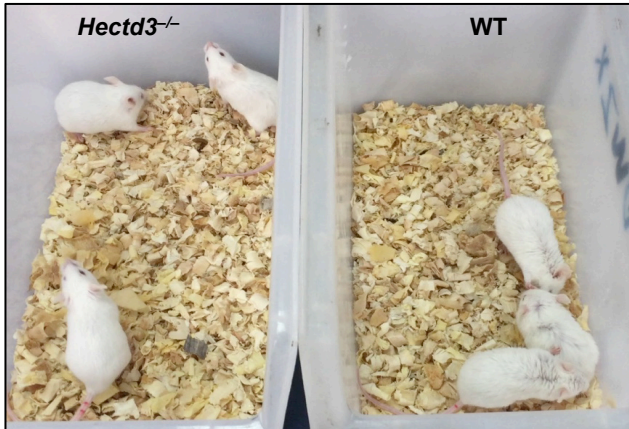**B**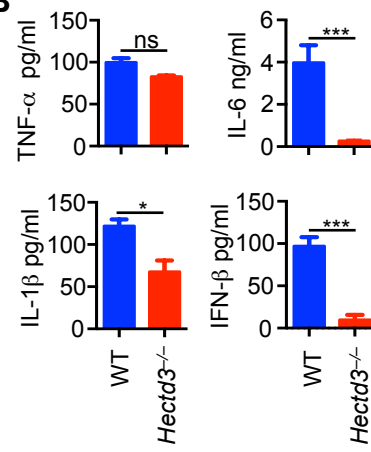



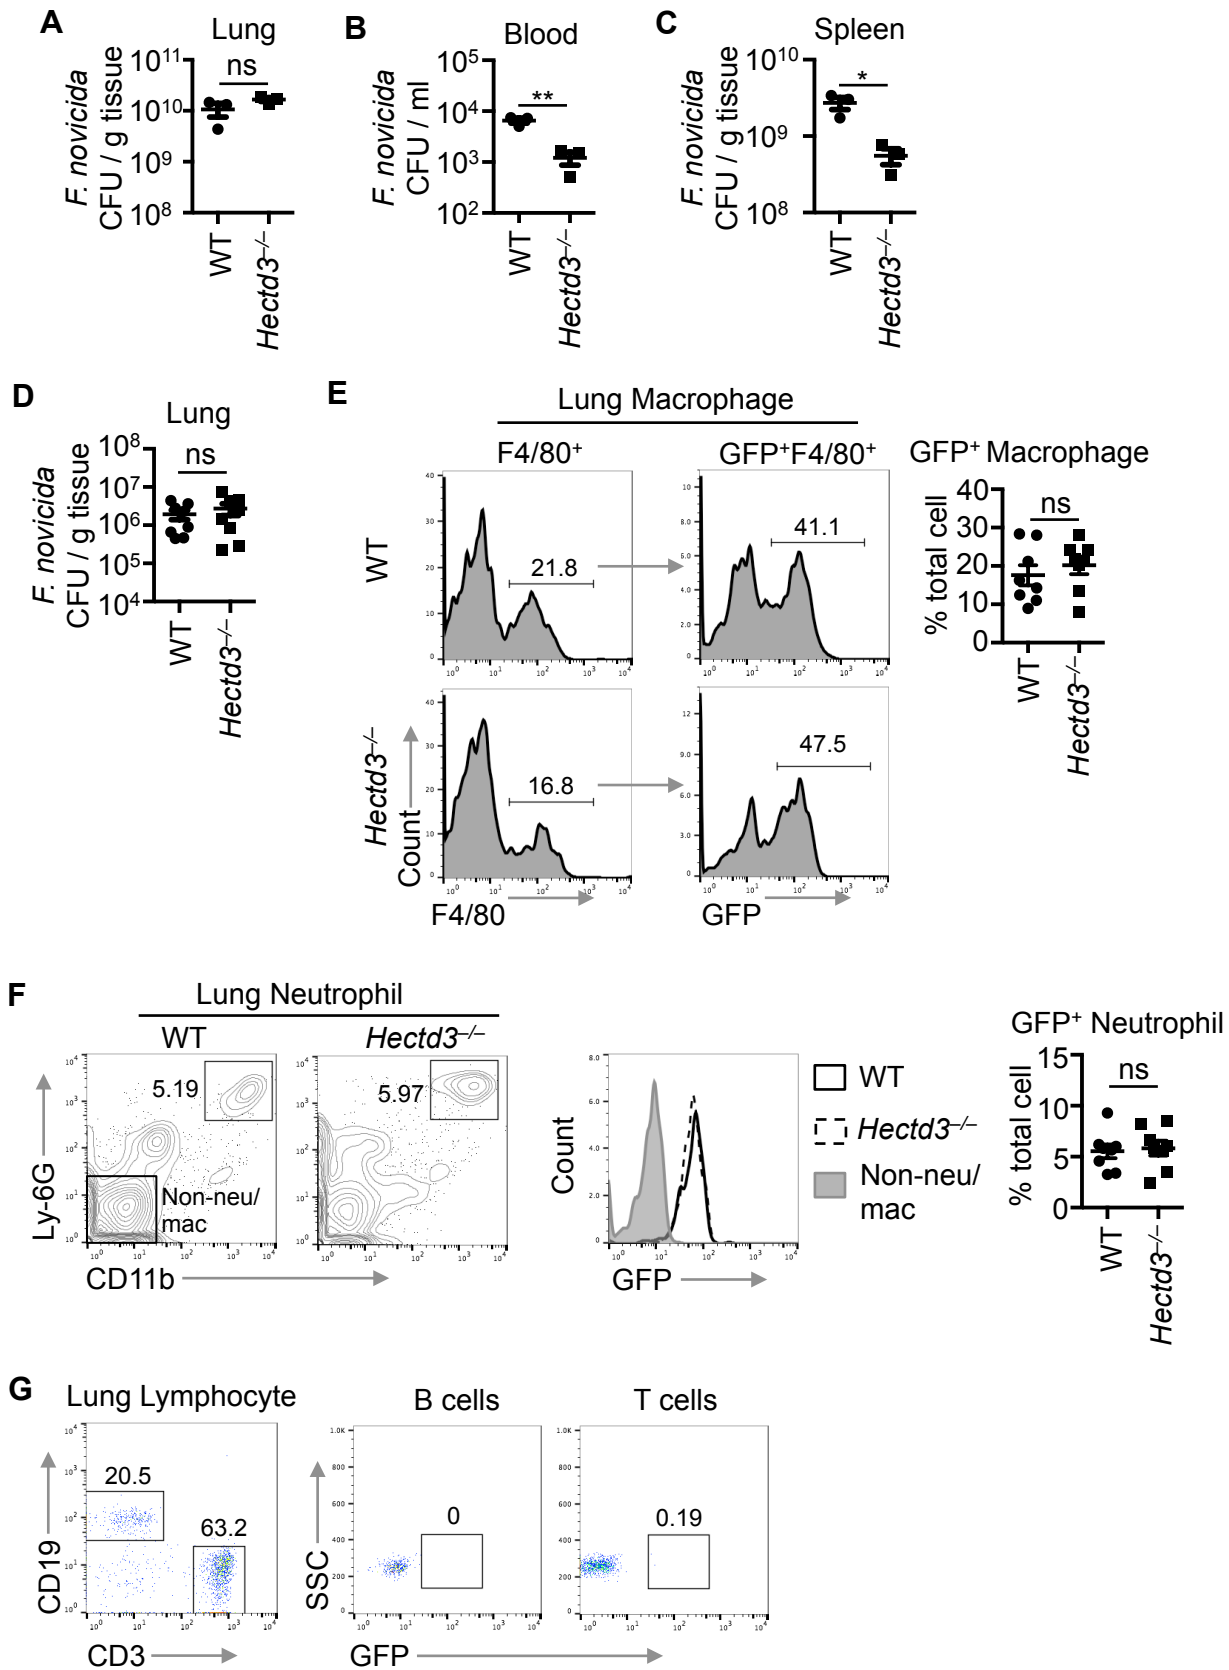

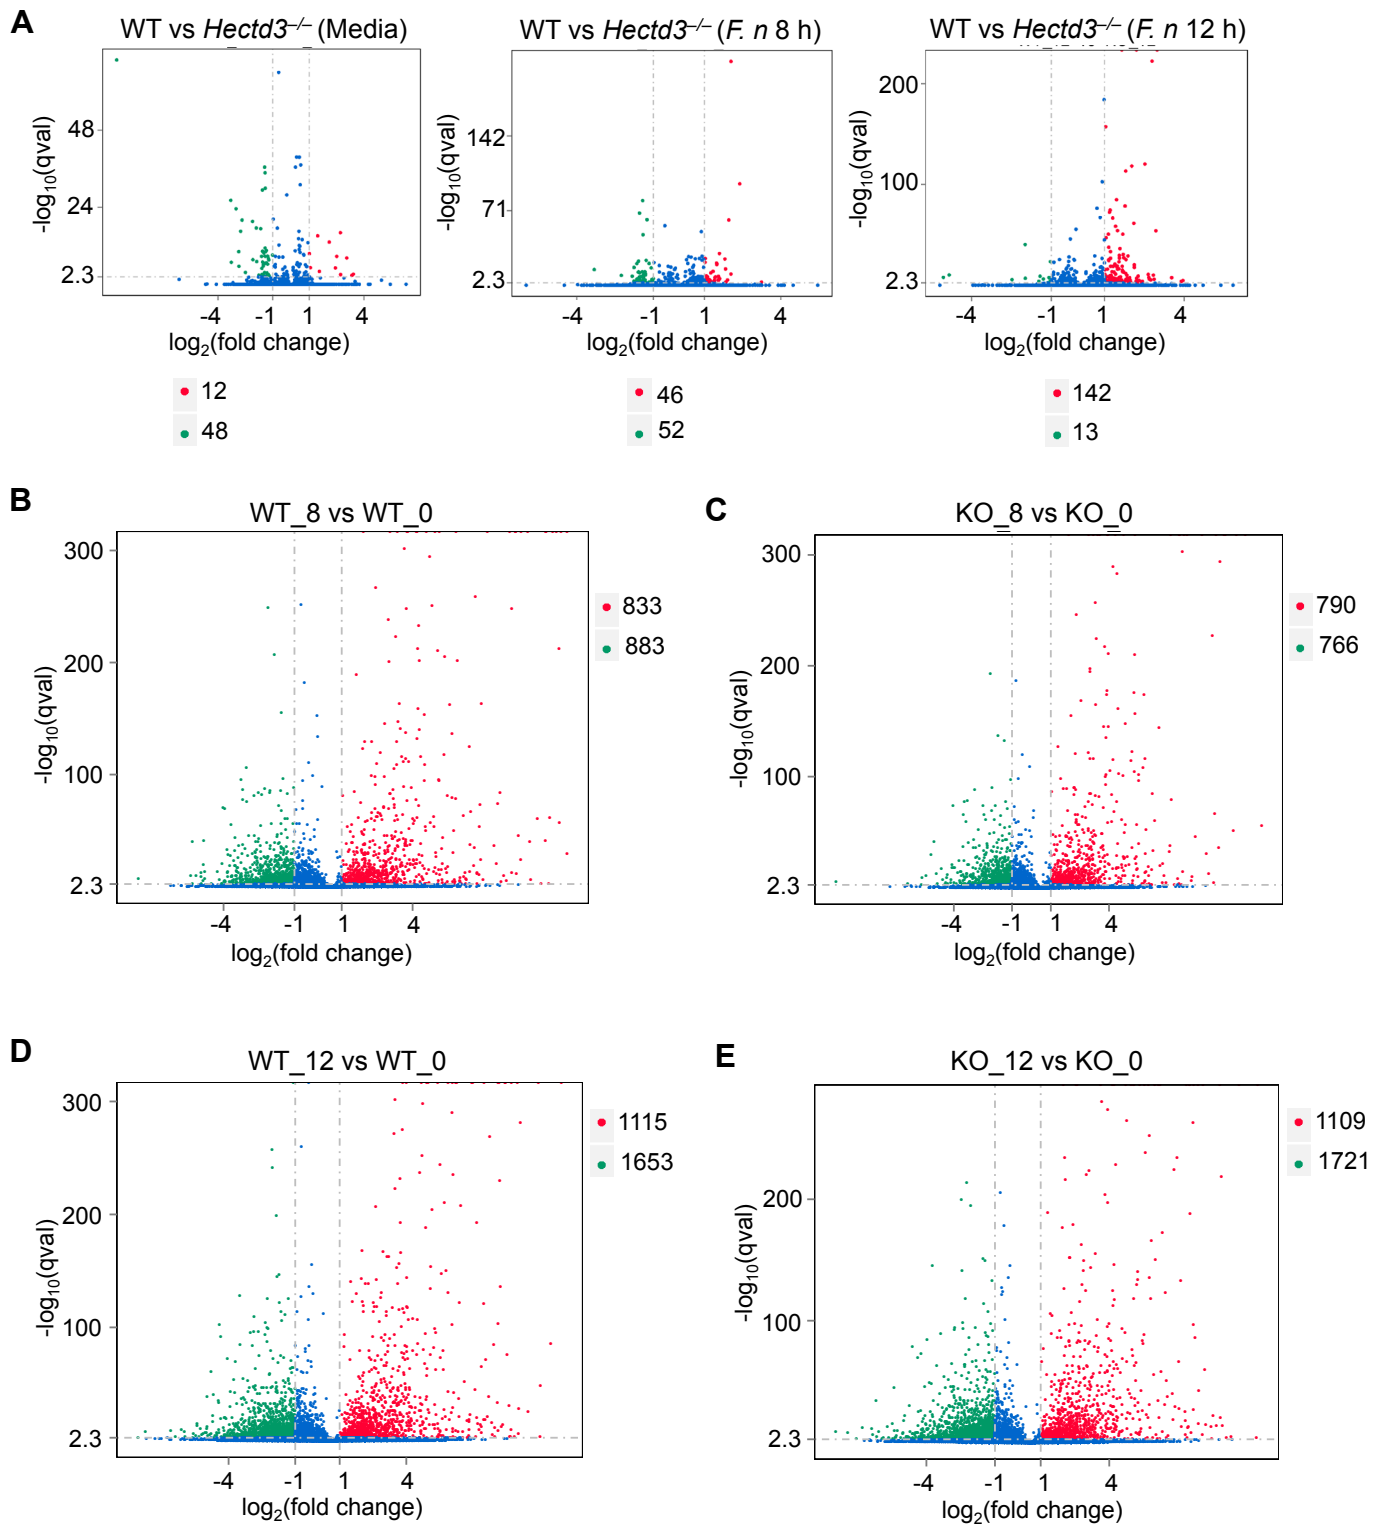

Supplemental Figure 4

**A**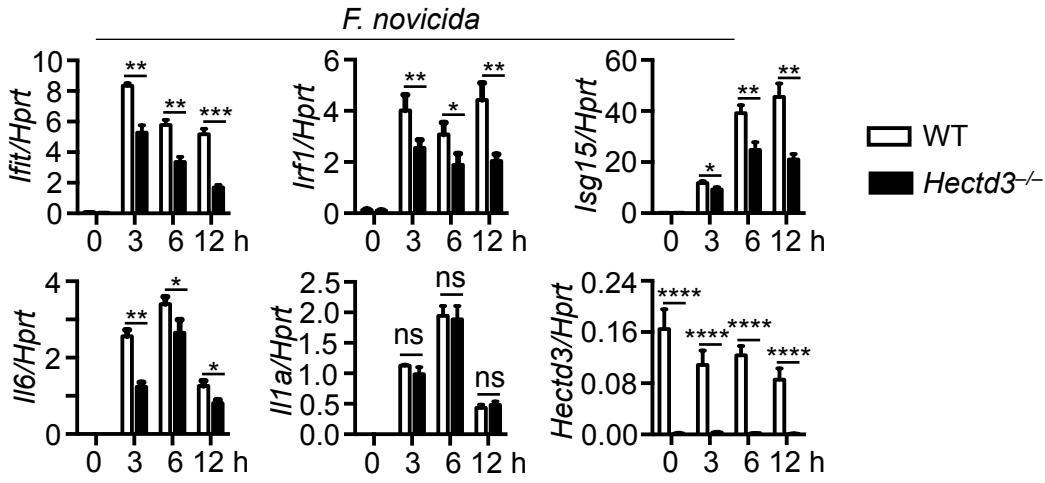**B**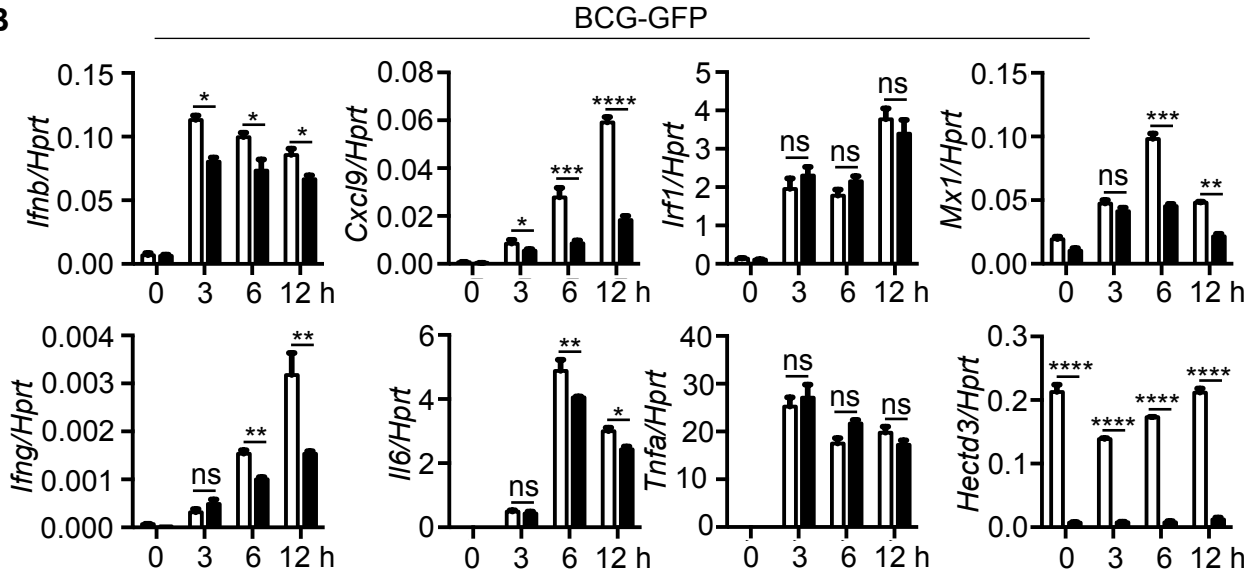**C**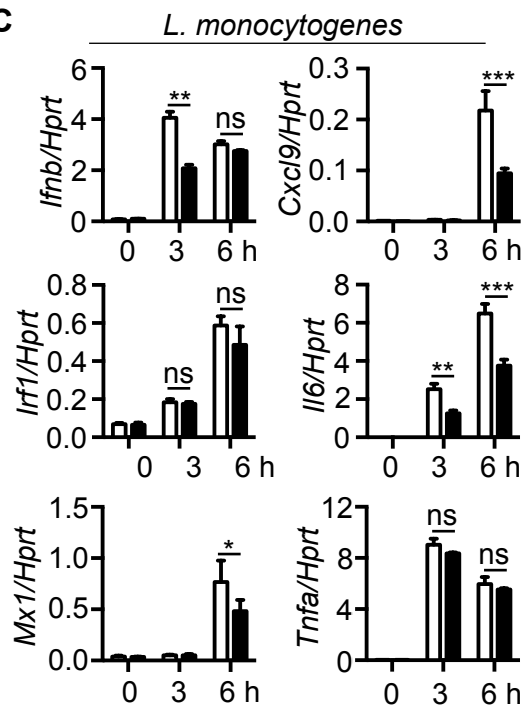**D**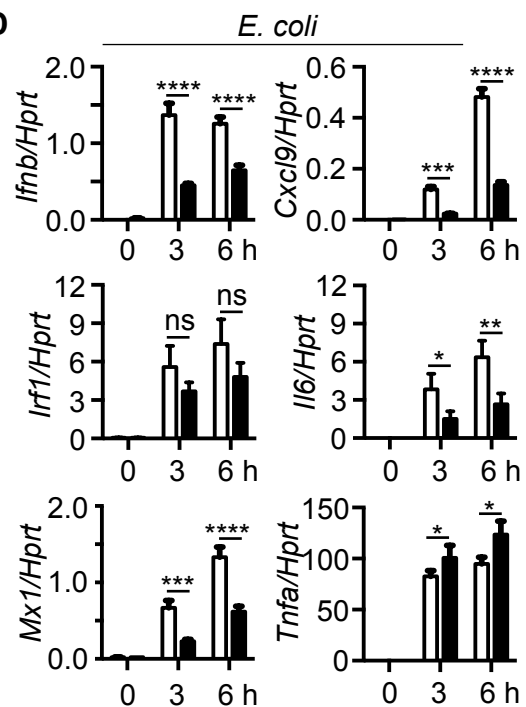

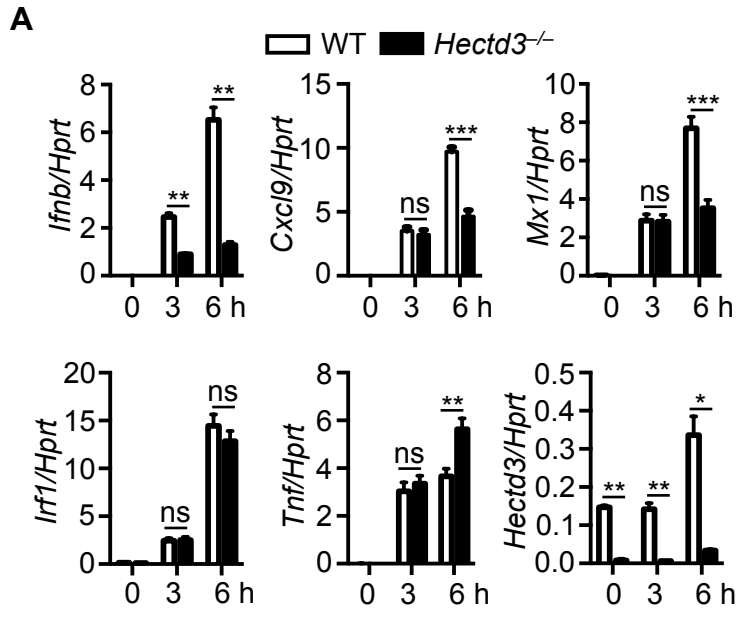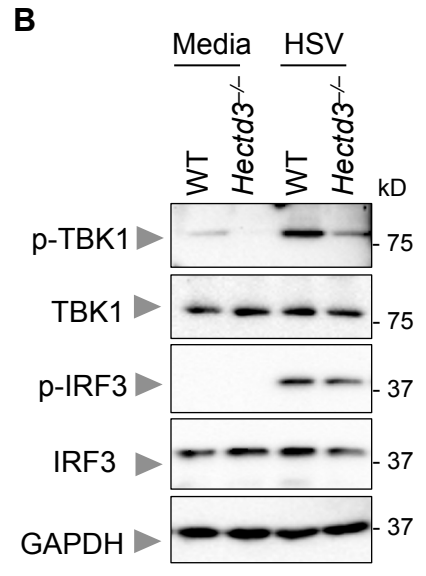

Supplemental Figure 6

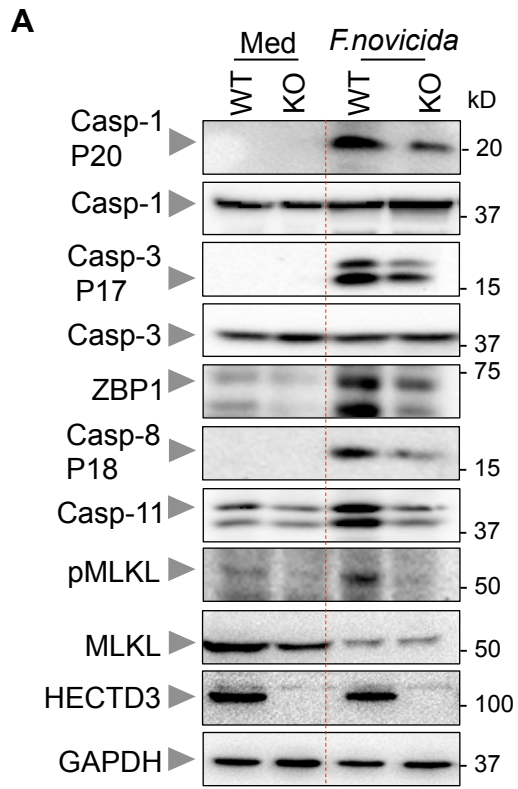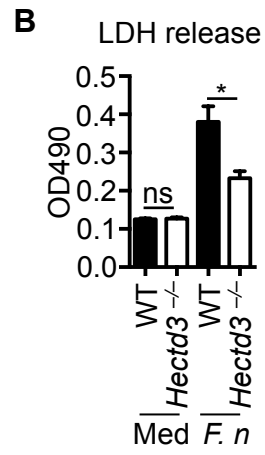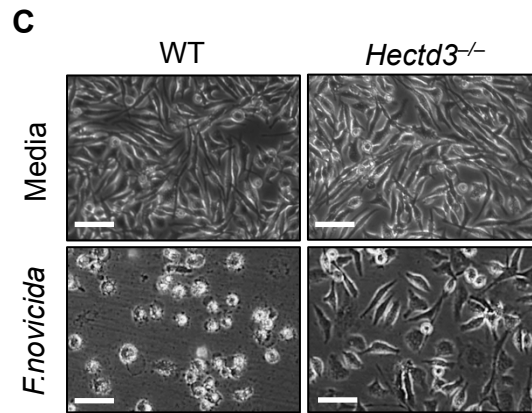

**A**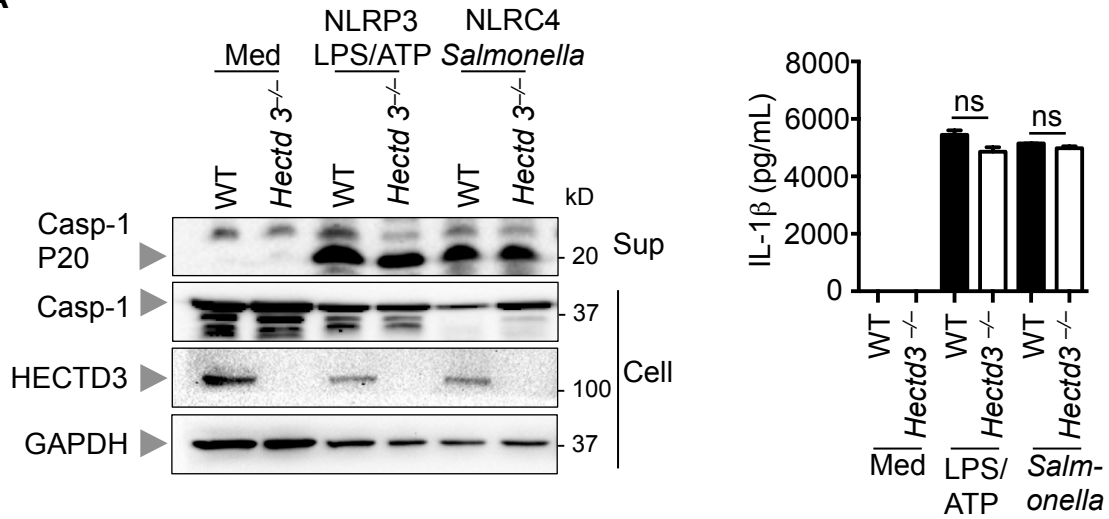**B**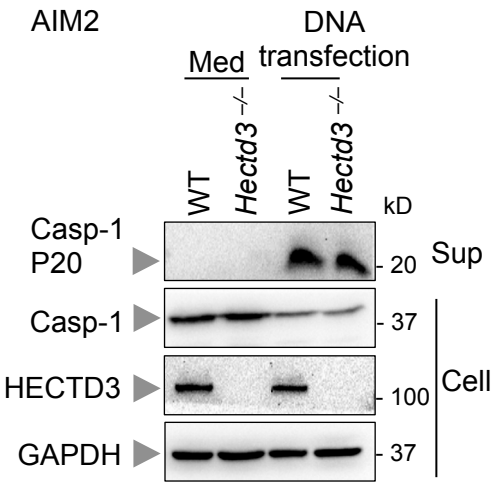**C**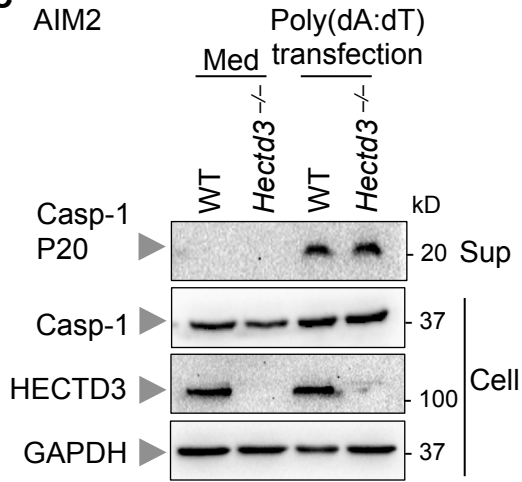**D**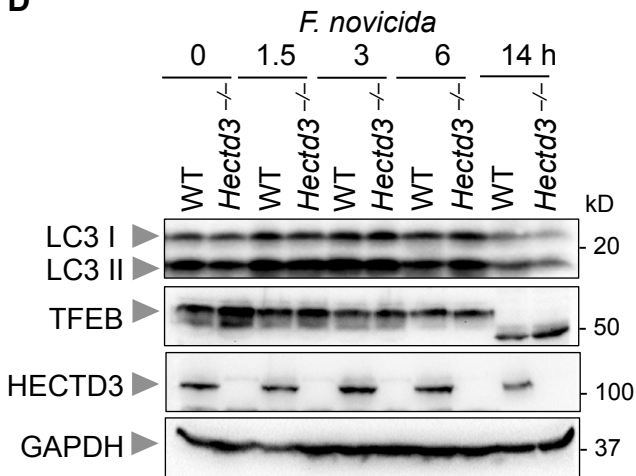**E**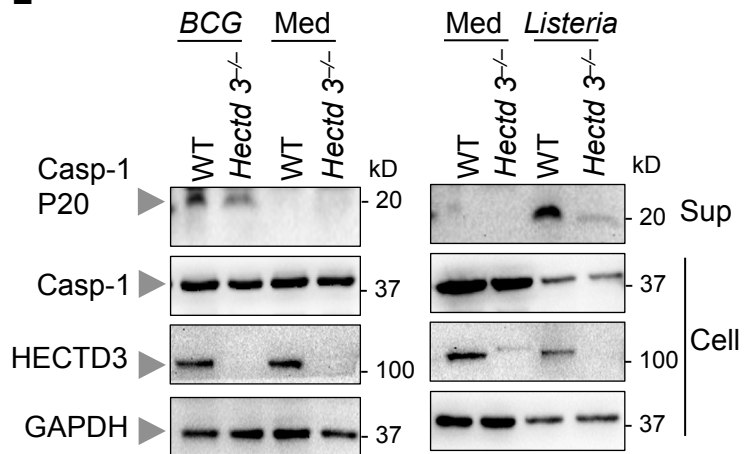

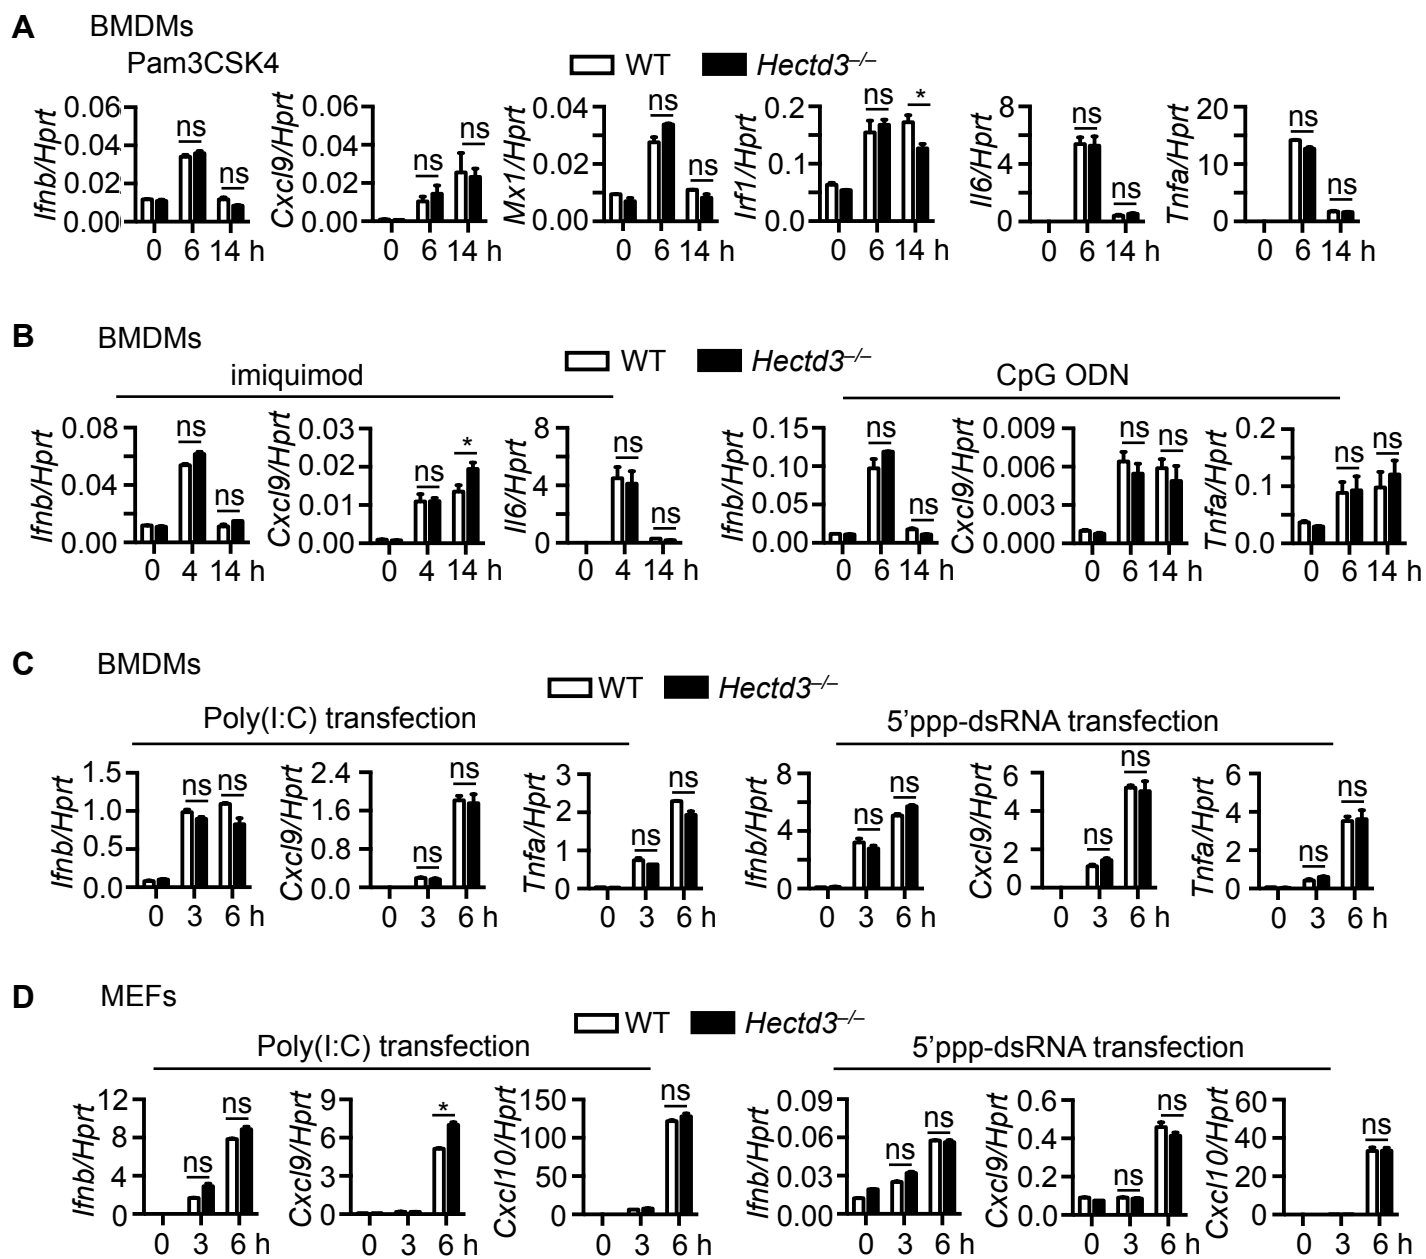

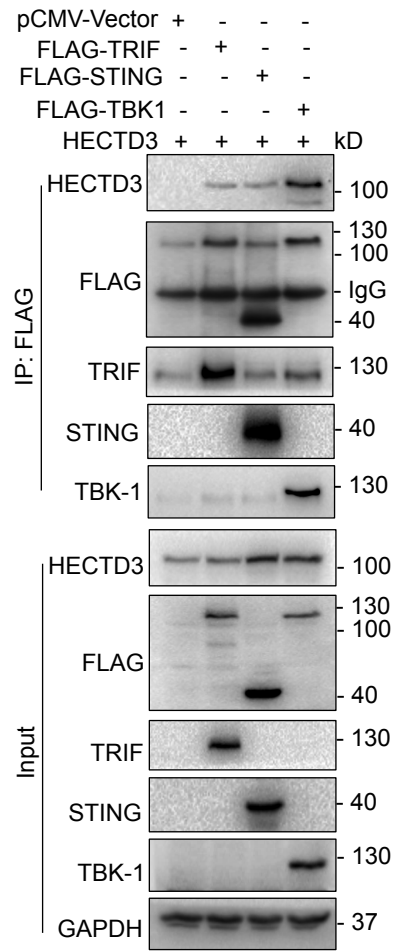



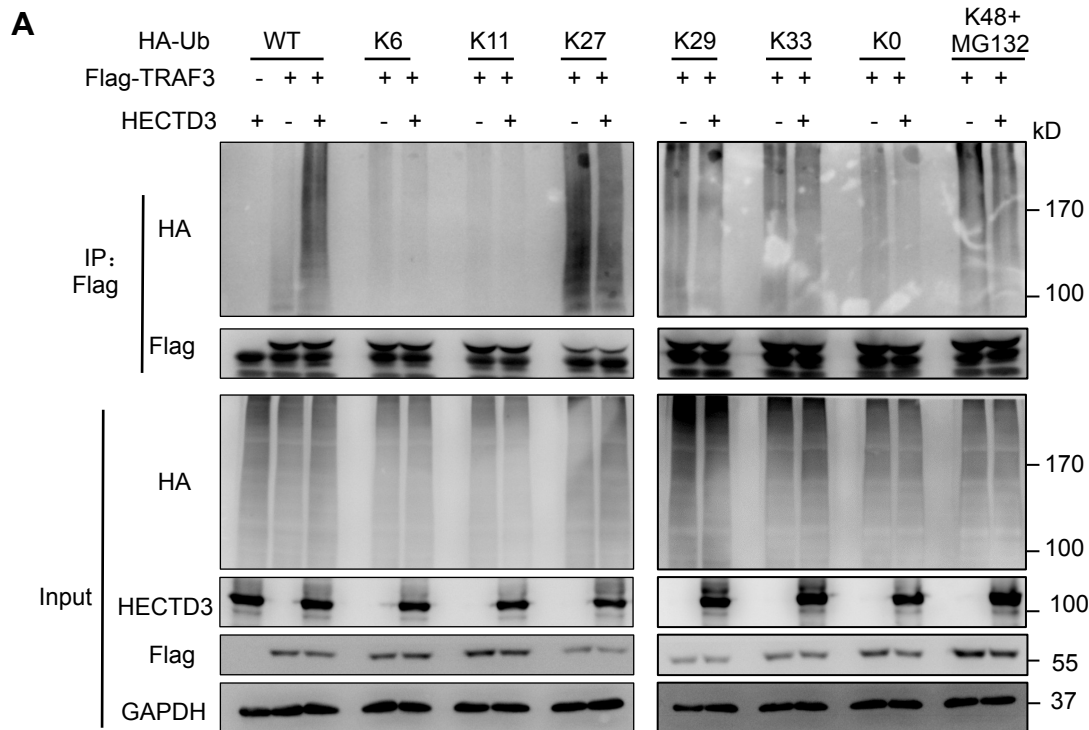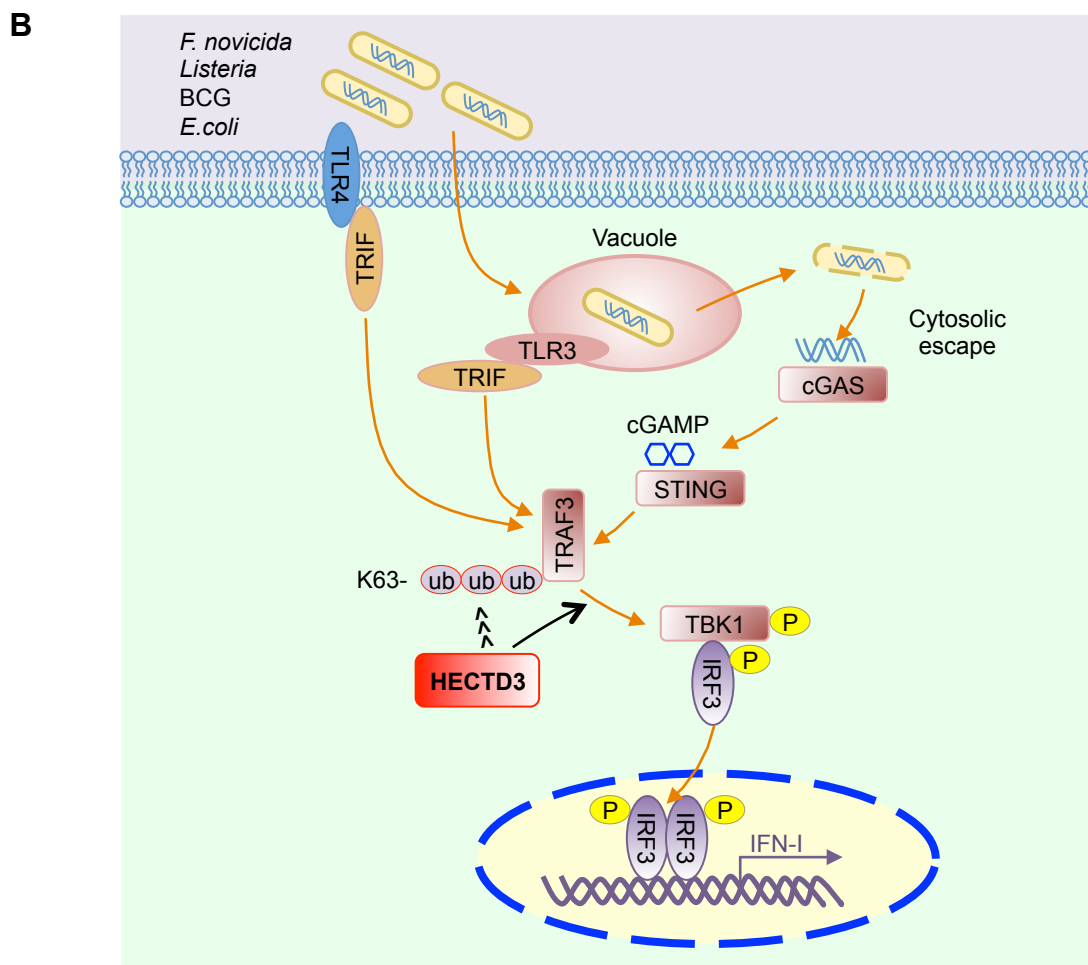

Supplement: sd1 [file 1]
